# Supplementary material
Source: PubMed Central journal article supplement (PMC4687445)
Supplement: onc2014428x11.pdf [file onc2014428x11.pdf]

## Supplementary Table 1

### ONCOMINE SEARCH CRITERIA/THRESHOLDS

|              |                                      |
|--------------|--------------------------------------|
| Cancer       | Adult Carcinomas                     |
| Dataset Size | 151+ (minimum 40 per cancer subtype) |
| Analysis     | Cancer vs Normal                     |
| Data Type    | mRNA                                 |
| Platform     | Affymetrix U133 (where possible)     |
| Fold change  | >1.1 or <0.9                         |
| P value      | less than 0.01                       |

|    | Oncomine Database Name (Data Source)                | Platform                 | Cancer Type Investigated                  | Controls | Cases | Probe       | Fold Change | P-Value            |
|----|-----------------------------------------------------|--------------------------|-------------------------------------------|----------|-------|-------------|-------------|--------------------|
| 1  | Bonome Ovarian (Cancer Res 2008/07/01)              | Affymetrix U133          | Ovarian Carcinoma                         | 10       | 185   | 212193_s_at | <b>1.98</b> | <b>&lt; 0.0001</b> |
| 2  | Haferlach Leukaemia (J Clin Oncol 2010/05/20)       | Affymetrix U133 plus 2.0 | EXCLUDED                                  |          |       |             |             |                    |
| 3  | Roessler Liver 2 (Cancer Res 2010/12/15)            | Affymetrix U133          | Hepatocellular Carcinoma                  | 220      | 225   | 212193_s_at | <b>1.84</b> | <b>&lt; 0.0001</b> |
| 4  | Hou Lung (PLoS One 2010/04/22)                      | Affymetrix U133 plus 2.0 | Lung Adenocarcinoma                       | 65       | 45    | 212193_s_at | <b>1.40</b> | <b>0.0002</b>      |
| 5  | TCGA Ovarian (TCGA 2011/03/24)                      | Affymetrix U133          | Ovarian Serous Carcinoma                  | 8        | 509   | 212193_s_at | <b>1.70</b> | <b>0.0024</b>      |
| 6  | Agnelli Myeloma (Genes Chrom Cancer 2009/07/01)     | Affymetrix U133          | EXCLUDED                                  |          |       |             |             |                    |
| 7  | Sun Brain (Cancer Cell 2006/04/01)                  | Affymetrix U133 plus 2.0 | Glioblastoma                              | 23       | 81    | 212193_s_at | <b>0.56</b> | <b>&lt; 0.0001</b> |
| 8  | TCGA Brain (TCGA 2012/03/01)                        | Affymetrix U133          | Glioblastoma                              | 10       | 515   | 212193_s_at | <b>0.83</b> | <b>0.0037</b>      |
| 9  | Coustan-Smith Leukaemia (Lancet Oncol 2009/10/02)   | Affymetrix U133          | EXCLUDED                                  |          |       |             |             |                    |
| 10 | Valk Leukaemia (N Engl J Med 2004/04/15)            | Affymetrix U133          | EXCLUDED                                  |          |       |             |             |                    |
| 11 | Sanchez-Carbayo Bladder 2 (J Clin Oncol 2006/02/10) | Affymetrix U133          | Infiltrating Bladder Uroepithelial Cancer | 48       | 81    | 212193_s_at | <b>1.50</b> | <b>&lt; 0.0001</b> |
| 12 | Barretina Sarcoma (Nat Genet 2010/07/04)            | Affymetrix U133          | EXCLUDED                                  |          |       |             |             |                    |

### NON-AFFYMETRIX STUDIES (largest studies added to include common cancers otherwise not represented)

|    |                                   |                                       |                               |     |      |              |             |                    |
|----|-----------------------------------|---------------------------------------|-------------------------------|-----|------|--------------|-------------|--------------------|
| 13 | TCGA Colorectal (TCGA 2011/09/08) | Agilent 244K Microarray (AMDID019760) | Colon/Caecal Adenocarcinoma   | 22  | 123  | A_24_P7212   | <b>1.82</b> | <b>&lt; 0.0001</b> |
| 14 | Curtis Breast (Nature 2012/06/21) | IlluminaHT                            | Invasive Ductal Breast Cancer | 144 | 1556 | ILMN_1681590 | <b>1.18</b> | <b>&lt; 0.0001</b> |
