# Supplementary material
Source: PubMed Central journal article supplement (PMC4687445)
Supplement: onc2014428x13.pdf [file onc2014428x13.pdf]

| Term     | KEGG Pathway                                           | Count | Fold Enrichment | p-Value     | Benjamini-Hochberg Corrected |
|----------|--------------------------------------------------------|-------|-----------------|-------------|------------------------------|
| hsa04512 | ECM-receptor interaction                               | 40    | 2.277792008     | 1.50E-08    | 2.86E-06                     |
| hsa04510 | Focal adhesion                                         | 68    | 1.65215847      | 2.73E-06    | 2.60E-04                     |
| hsa04360 | Axon guidance                                          | 38    | 1.822233607     | 5.35E-05    | 0.003380312                  |
| hsa05412 | Arrhythmogenic right ventricular cardiomyopathy (ARVC) | 28    | 2.040901639     | 5.74E-05    | 0.002723909                  |
| hsa04142 | Lysosome                                               | 47    | 1.679313324     | 7.77E-05    | 0.002948841                  |
| hsa04070 | Phosphatidylinositol signaling system                  | 29    | 1.677611892     | 0.002537246 | 0.077297314                  |
| hsa04810 | Regulation of actin cytoskeleton                       | 56    | 1.35159049      | 0.008408672 | 0.204830814                  |
| hsa04010 | MAPK signaling pathway                                 | 77    | 1.281388016     | 0.008750621 | 0.188395315                  |
| hsa05410 | Hypertrophic cardiomyopathy (HCM)                      | 26    | 1.606036399     | 0.008897199 | 0.171940545                  |
| hsa05414 | Dilated cardiomyopathy                                 | 28    | 1.569924338     | 0.009142807 | 0.160133501                  |
| hsa00230 | Purine metabolism                                      | 35    | 1.386482092     | 0.02733238  | 0.380397195                  |
| hsa04520 | Adherens junction                                      | 21    | 1.56191452      | 0.028358194 | 0.365865504                  |
| hsa04666 | Fc gamma R-mediated phagocytosis                       | 29    | 1.428237151     | 0.031434543 | 0.372996949                  |
| hsa04370 | VEGF signaling pathway                                 | 23    | 1.496834748     | 0.034807373 | 0.381713251                  |
| hsa04062 | Chemokine signaling pathway                            | 31    | 1.394796094     | 0.0356724   | 0.368783665                  |
| hsa05200 | Pathways in cancer                                     | 74    | 1.20937477      | 0.040537022 | 0.38823429                   |
| hsa00561 | Glycerolipid metabolism                                | 16    | 1.619763206     | 0.044842553 | 0.401163252                  |
| hsa00520 | Amino sugar and nucleotide sugar metabolism            | 16    | 1.619763206     | 0.044842553 | 0.401163252                  |
| hsa04610 | Complement and coagulation cascades                    | 18    | 1.56191452      | 0.044962313 | 0.38467384                   |
| hsa05222 | Small cell lung cancer                                 | 26    | 1.414270859     | 0.047896502 | 0.387872899                  |
| hsa04662 | B cell receptor signaling pathway                      | 23    | 1.445219757     | 0.051353055 | 0.393970428                  |
| hsa00430 | Taurine and hypotaurine metabolism                     | 5     | 3.037056011     | 0.051633359 | 0.381000848                  |
| hsa00052 | Galactose metabolism                                   | 11    | 1.822233607     | 0.052749841 | 0.373760472                  |
| hsa04150 | mTOR signaling pathway                                 | 17    | 1.548898566     | 0.056589686 | 0.381976314                  |
| hsa00051 | Fructose and mannose metabolism                        | 14    | 1.645888419     | 0.05677984  | 0.370464573                  |
| hsa04020 | Calcium signaling pathway                              | 45    | 1.261546343     | 0.059650275 | 0.373386922                  |
| hsa05217 | Basal cell carcinoma                                   | 15    | 1.56191452      | 0.071947924 | 0.420533031                  |
| hsa00310 | Lysine degradation                                     | 13    | 1.579269126     | 0.092032973 | 0.493082153                  |
| hsa00563 | Glycosylphosphatidylinositol(GPI)-anchor biosynthesis  | 11    | 1.670380806     | 0.093138901 | 0.484909173                  |
| hsa00562 | Inositol phosphate metabolism                          | 19    | 1.413160756     | 0.097039391 | 0.487664749                  |
| hsa04640 | Hematopoietic cell lineage                             | 19    | 1.413160756     | 0.097039391 | 0.487664749                  |
